# Supplementary material
Source: PubMed Central journal article supplement (PMC6450717)
Supplement: NIHMS1520445-supplement-1.pdf [file NIHMS1520445-supplement-1.pdf]

Figure S1

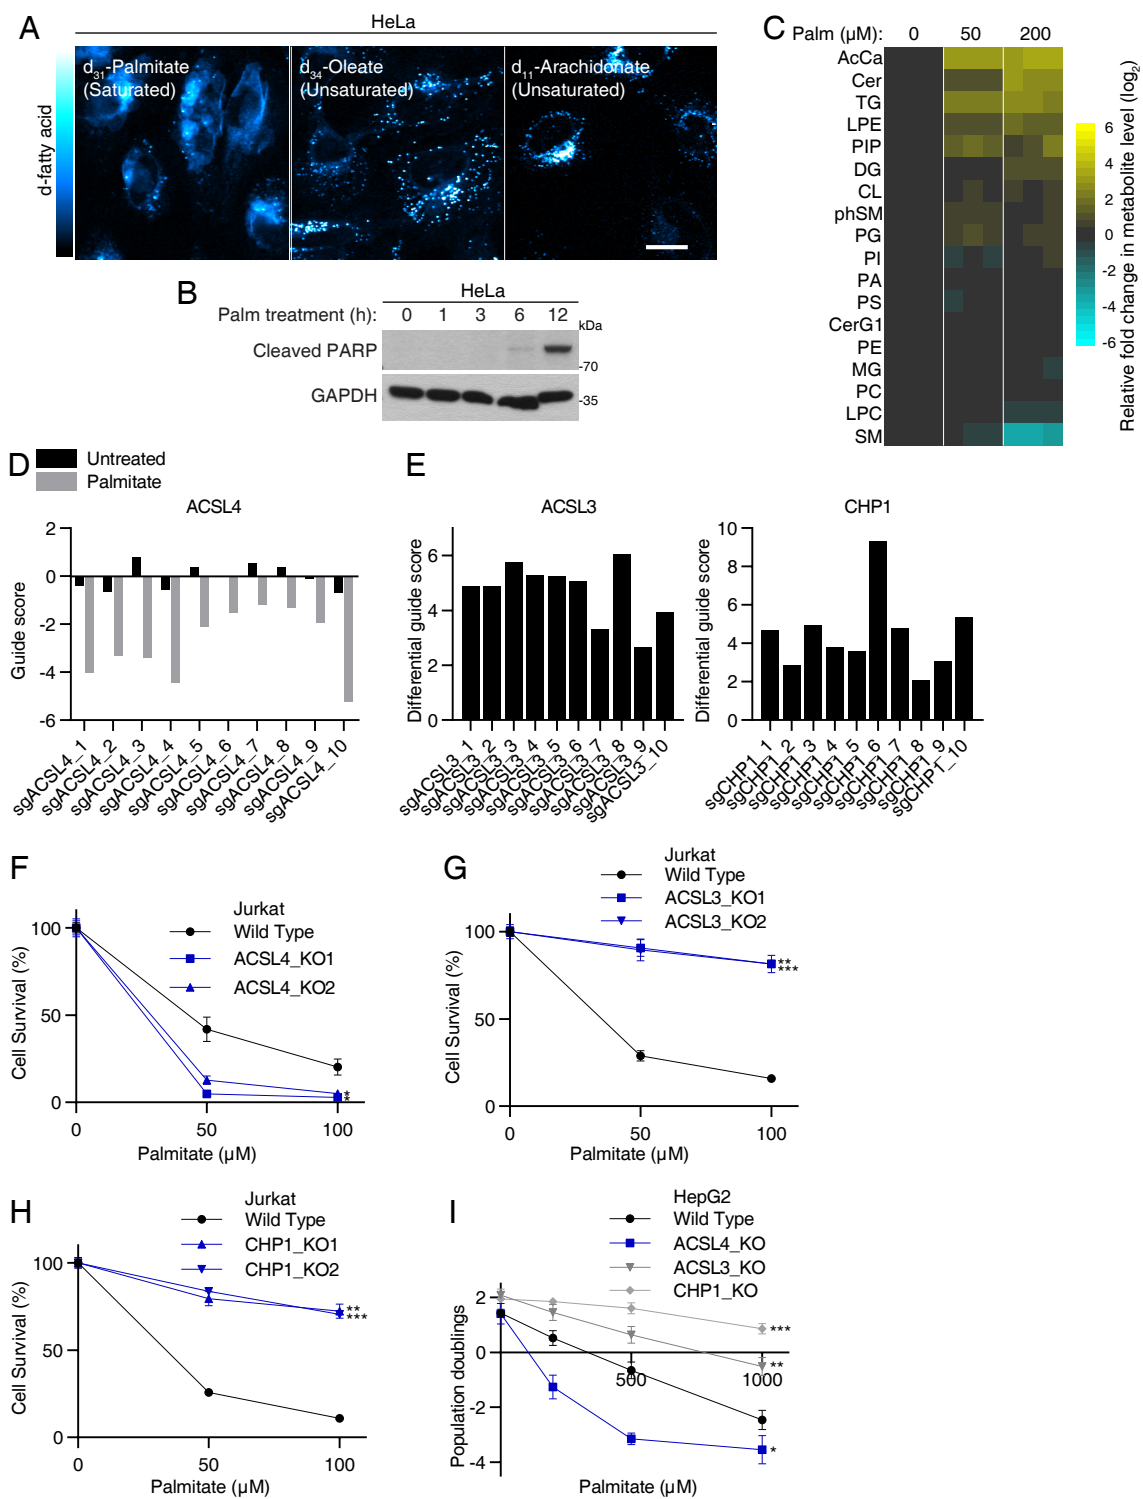

Figure S2

A

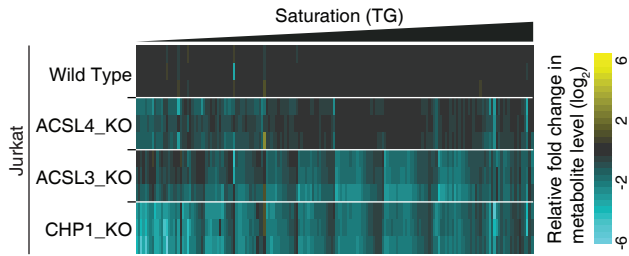

B

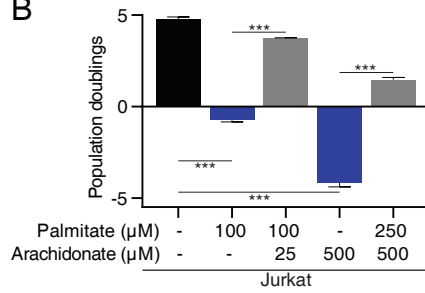

C

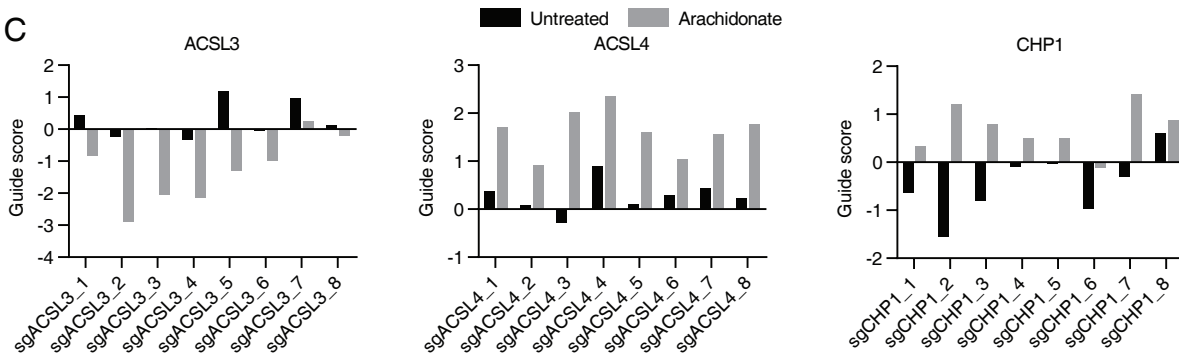

D

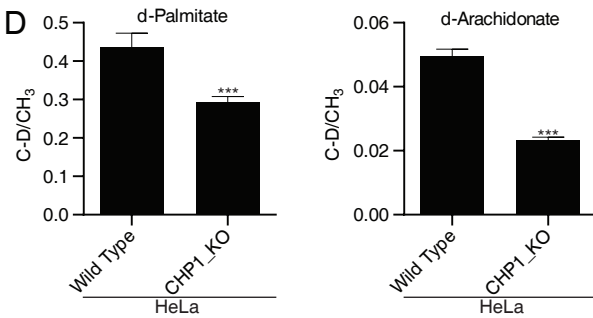

E

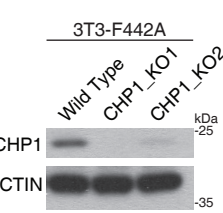

F

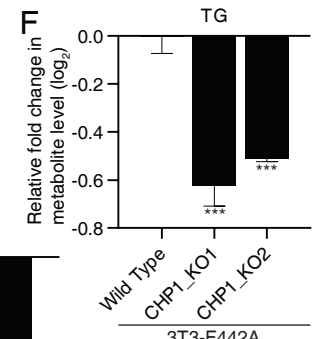

G

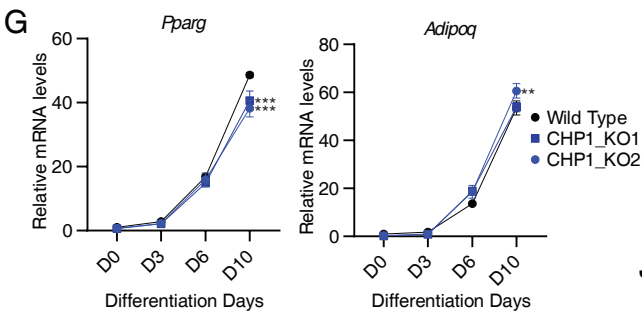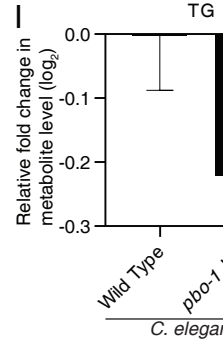

H

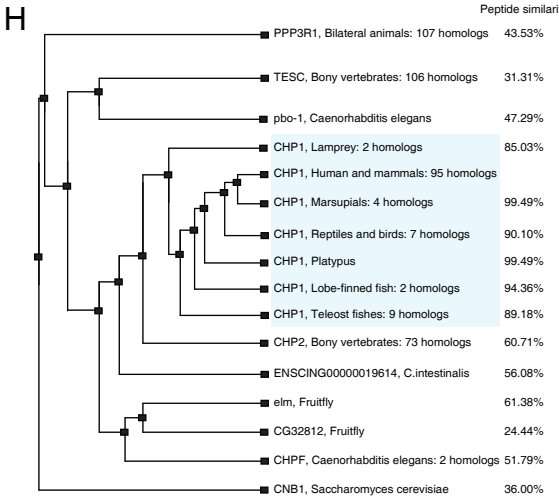

J

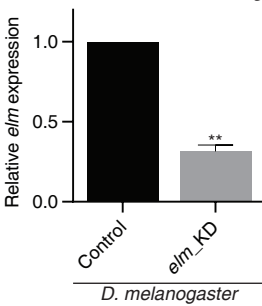

K

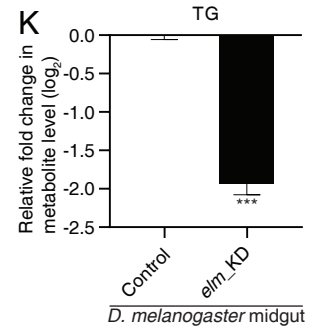

L

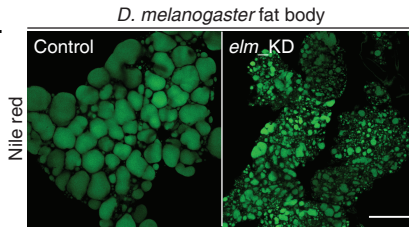

Figure S3

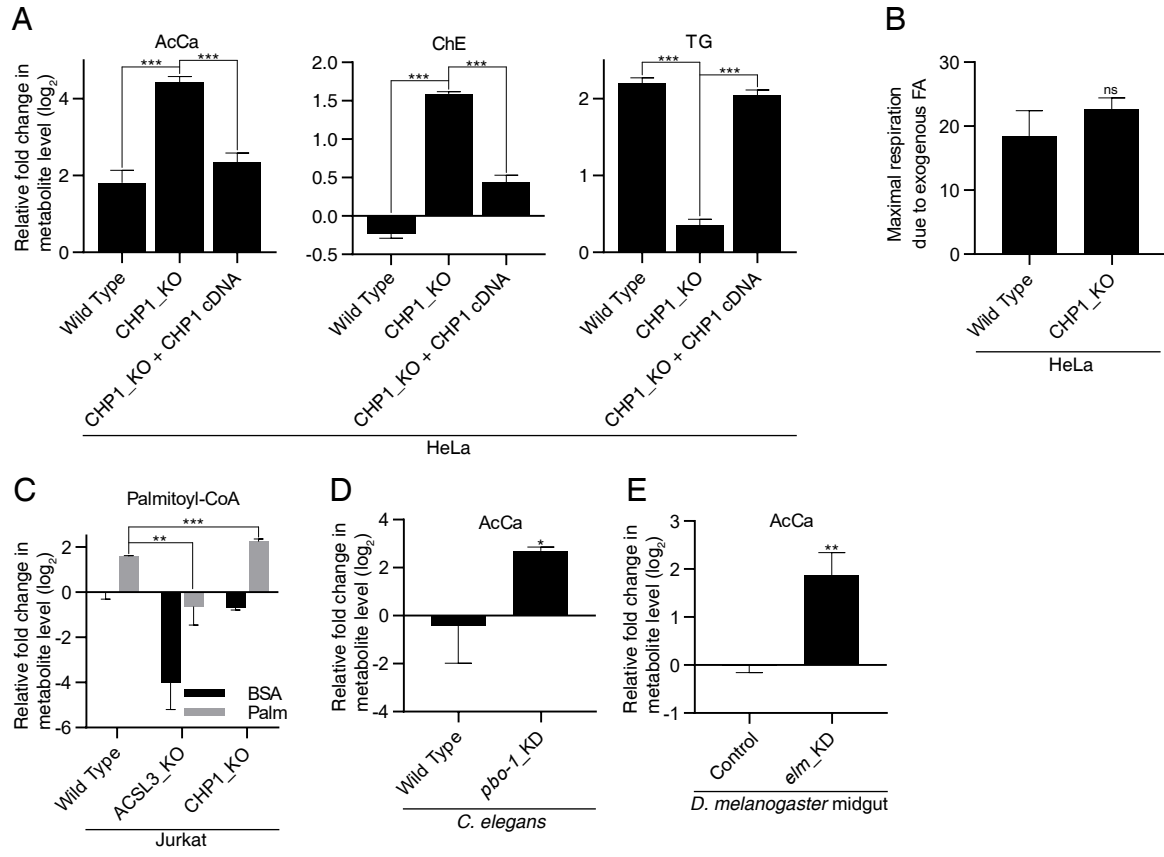

Figure S4

A

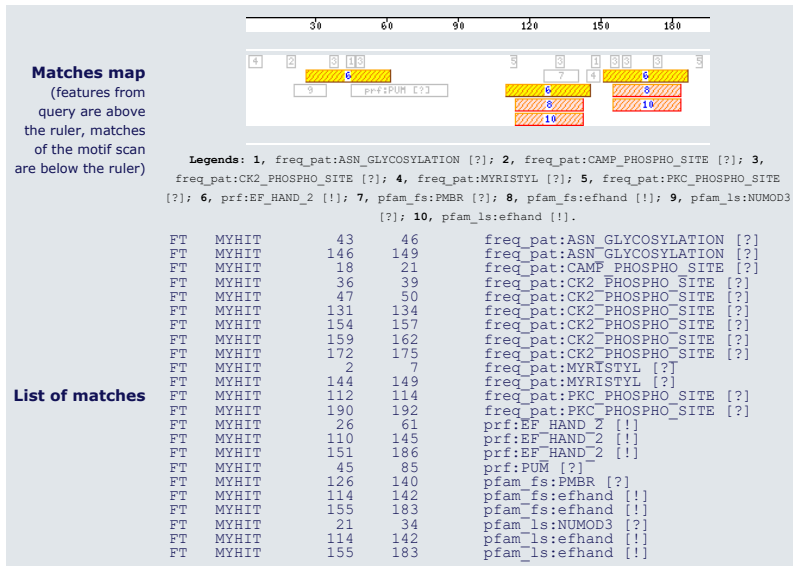

B

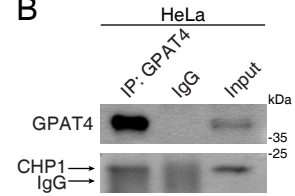

C

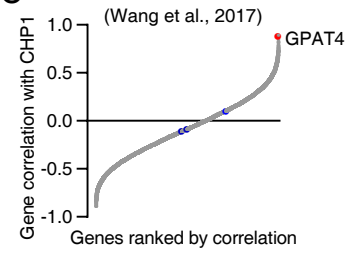

D

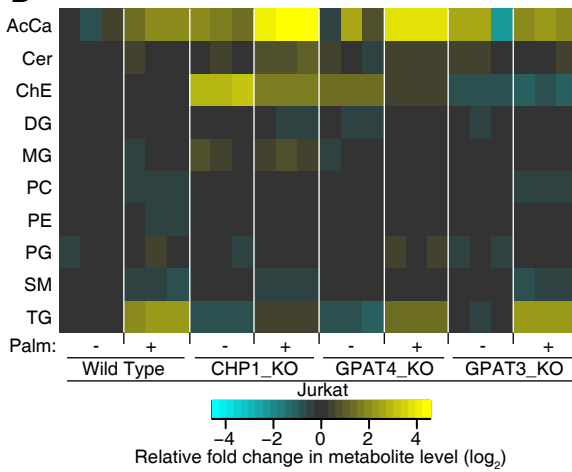

E

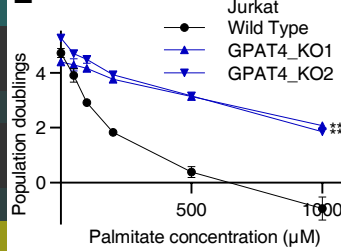

F

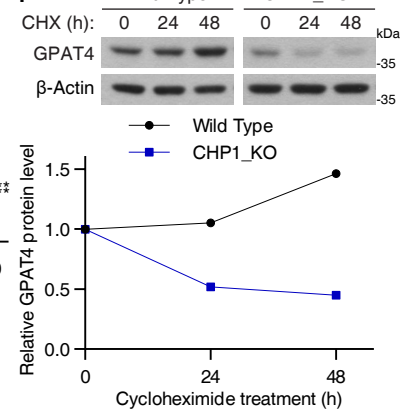

G

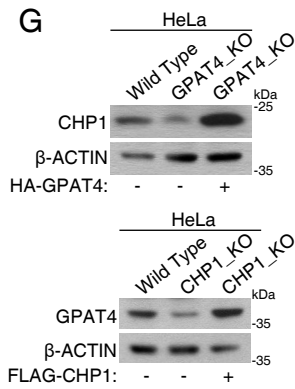

H

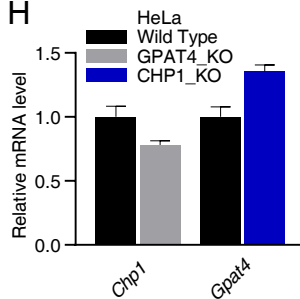

I

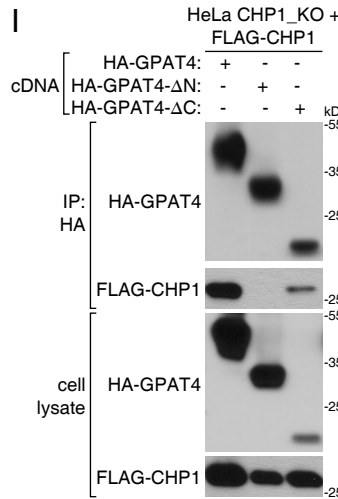

K

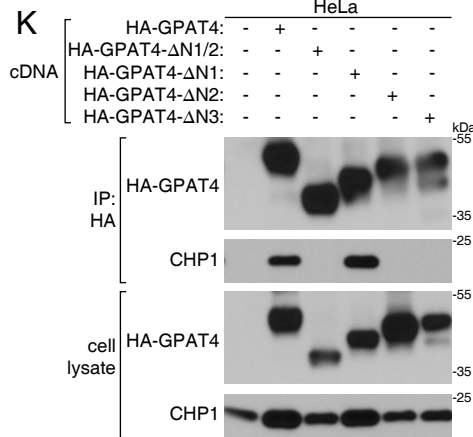

L

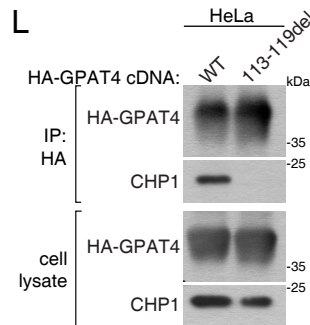

J

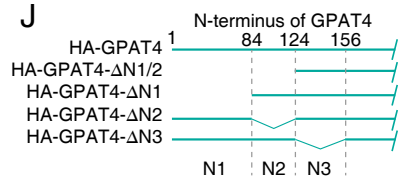



Figure S5

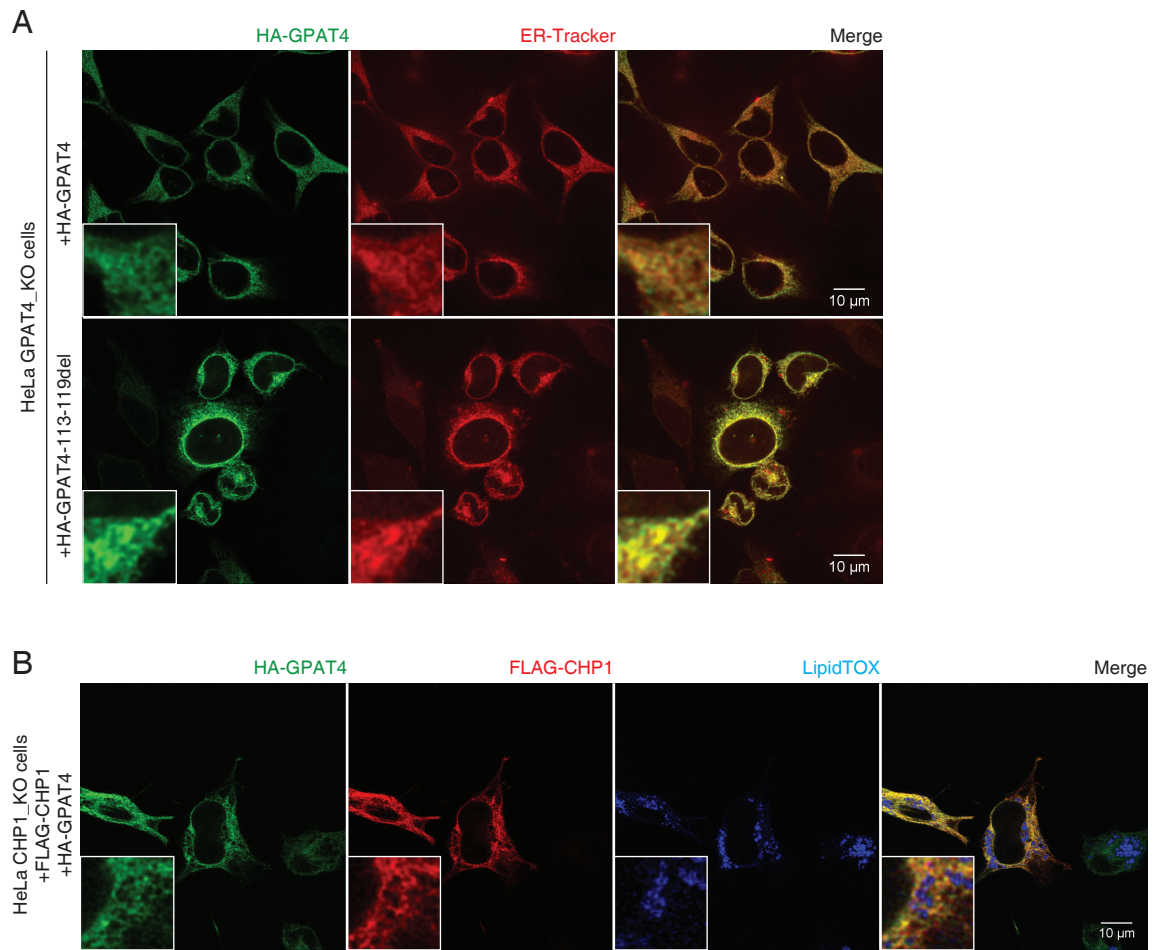

Figure S6

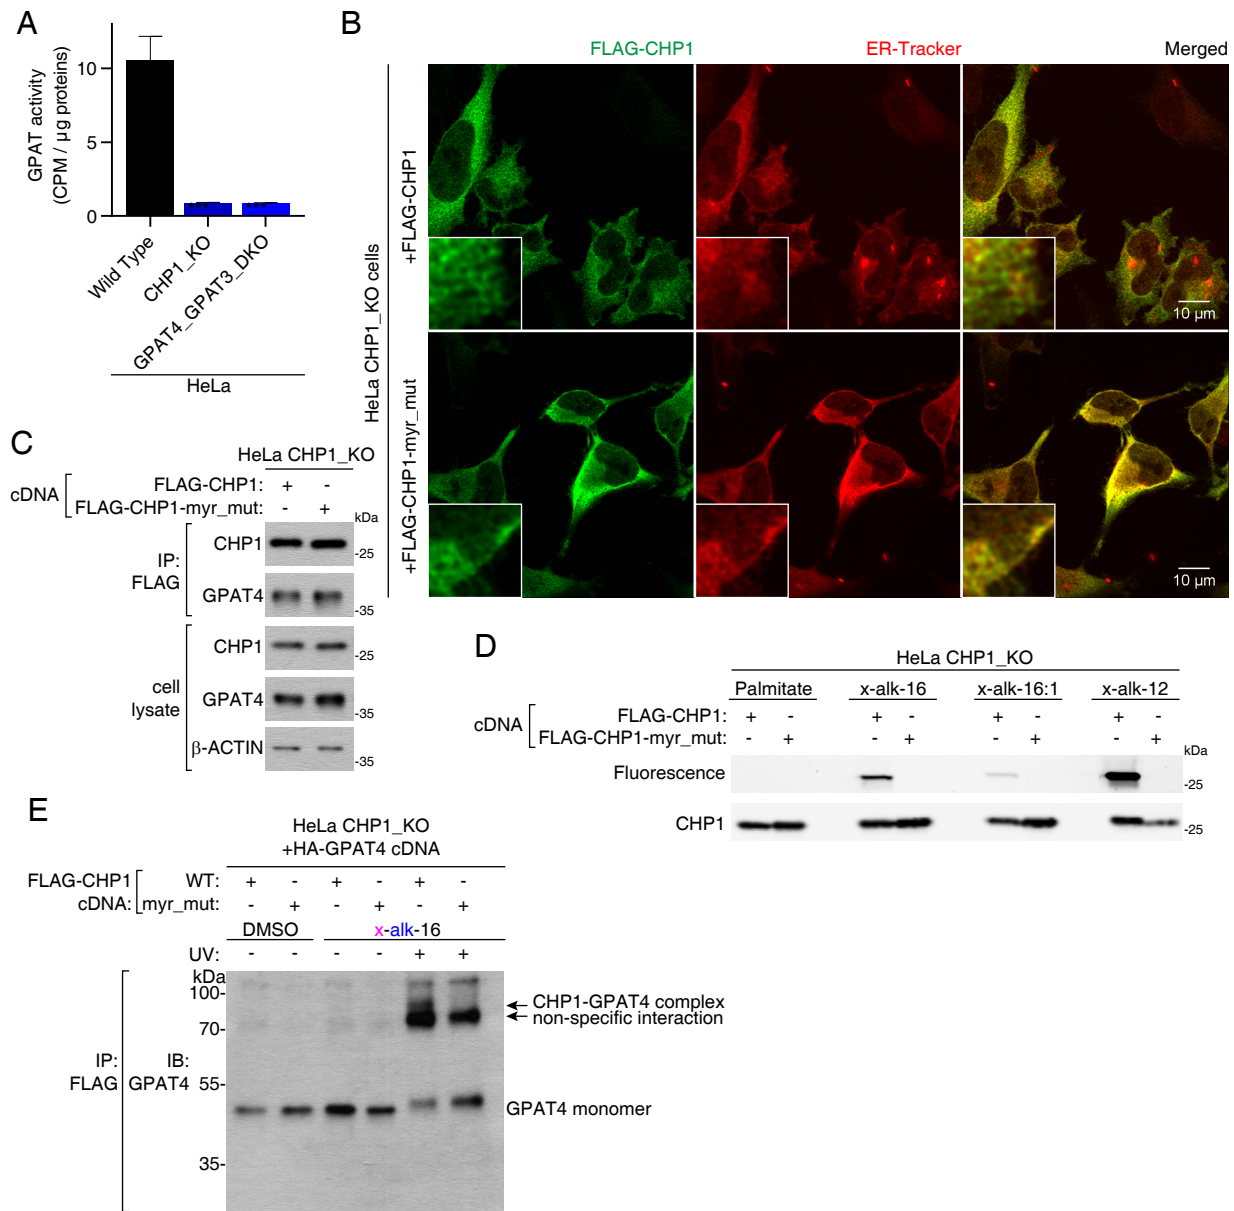

Figure S7

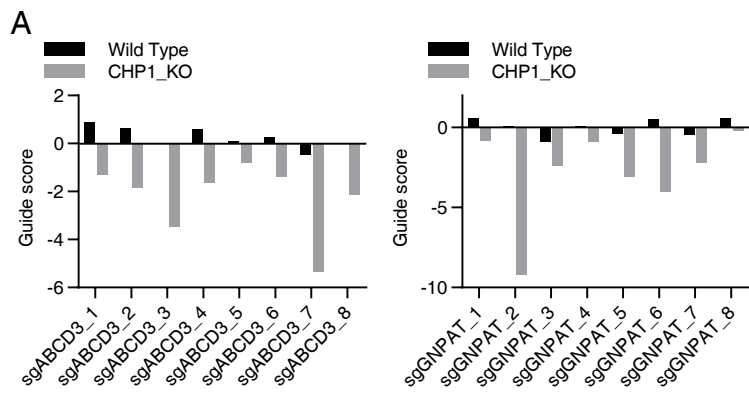

## Supplemental Figure Legends

### Figure S1: ACSL4, ACSL3 and CHP1 are key regulators of adaptation to excess fatty acid, Related to Figure 1.

(A) Stimulated Raman scattering imaging of the indicated deuterium-labeled fatty acid treated HeLa cells. Intensity indicates the relative concentrations of labeled fatty acid metabolites. Scale bar, 20  $\mu\text{m}$ .

(B) Immunoblot analysis of HeLa cells treated with 500  $\mu\text{M}$  palmitate for the indicated durations. Cleaved PARP was used to show the extent of cell death. GAPDH was used as a loading control.

(C) Relative abundance of indicated lipid groups in Jurkat cells treated with 50  $\mu\text{M}$  and 200  $\mu\text{M}$  palmitate after a 24-hour treatment. Lipid species of the same group were summed. Values were normalized to the average of the untreated controls (n=3).

(D) Guide scores ( $\log_2$  fold change) of individual sgRNAs targeting ACSL4 used in the negative screen in the presence (gray) or absence (black) of palmitate.

(E) Differential guide scores ((palmitate)-(untreated)) of individual sgRNAs targeting ACSL3 and CHP1 used in the positive screen.

(F) Relative cell numbers of Jurkat wild type (black) and two clones of ACSL4\_KO cells (blue) after a 4-day treatment with the indicated palmitate concentrations. Cell numbers were normalized to the untreated control (mean  $\pm$  SD, n=3). \*p < 0.05 versus wild type.

(G) Relative cell numbers of Jurkat wild type (black) and two clones of ACSL3\_KO cells (blue) after a 4-day treatment with the indicated palmitate concentrations. Cell numbers were normalized to the untreated control (mean  $\pm$  SD, n=3). \*\*p < 0.01, \*\*\*p < 0.001 versus wild type.

(H) Relative cell numbers of Jurkat wild type (black) and two clones of CHP1\_KO cells (blue) after a 4-day treatment with the indicated palmitate concentrations. Cell numbers were normalized to the untreated control (mean  $\pm$  SD, n=3). \*\*p < 0.01, \*\*\*p < 0.001 versus wild type.

(I) Fold change in cell number ( $\log_2$ ) of HepG2 wild type (black), ACSL4\_KO (blue), ACSL3\_KO and CHP1\_KO (gray) cells after a 4-day treatment with the indicated palmitate concentrations (mean  $\pm$  SD, n=3). \*p < 0.05, \*\*p < 0.01, \*\*\*p < 0.001 versus wild type.

Abbreviations for lipid groups used above and in subsequent figures: acylcarnitine (AcCa), ceramides (Cer), triacylglycerol (TG), lysophosphatidylethanolamine (LPE), phosphatidylinositol phosphate (PIP), diacylglycerol (DG), cardiolipin (CL), sphingomyelin(phytosphingosine) (phSM), phosphatidylglycerol (PG), phosphatidylinositol (PI), phosphatidic acid (PA), phosphatidylserine (PS), neutral glycosphingolipid (CerG1), phosphatidylethanolamine (PE), monoacylglycerol (MG), phosphatidylcholine (PC), lysophosphatidylcholine (LPC) and sphingomyelin (SM).

### Figure S2: CHP1 loss prevents fatty acid incorporation and lipid accumulation, Related to Figure 2.

(A) Relative difference in abundance of triacylglycerol (TG) species ranked by saturation (number of double bonds) of the indicated cell lines. Values were normalized to the average of the wild type Jurkat cells (n=3).

(B) Fold change in cell number ( $\log_2$ ) of Jurkat cells after a 4-day treatment with the indicated fatty acid concentrations (mean  $\pm$  SD, n=3). \*\*\*p < 0.001.

(C) Guide scores ( $\log_2$  fold change) of individual sgRNAs targeting ACSL3, ACSL4 and CHP1 used in the arachidonate screen in the presence (gray) or absence (black) of arachidonate.

(D) Normalized d-fatty acid abundance within wild type and CHP1\_KO HeLa cells used in **Figure 2D** as indicated by C-D/CH<sub>3</sub> ratio. d-fatty acid intensity (C-D signal) was normalized to total protein intensity (CH<sub>3</sub> signal) to obtain normalized d-fatty acid level (mean ± SD, n=3). \*\*\*p < 0.001 versus wild type.

(E) Immunoblot analysis of wild type and CHP1\_KO 3T3-F442A cells used in **Figure 2F**. β-actin was used as a loading control.

(F) Fold change (log<sub>2</sub>) in the abundance of triacylglycerols of wild type and CHP1\_KO 3T3-F442A preadipocytes. Values were normalized to the average of the wild type cells (mean ± SD, n=3). \*\*\*p < 0.001 versus wild type.

(G) Relative mRNA expression levels of indicated adipocyte differentiation markers in wild type and CHP1\_KO 3T3-F442A cells collected on the indicated days upon start of differentiation. Minimal differences in differentiation were seen in the CHP1\_KO cells. Expression levels were normalized to *Rpl32* (mean ± SD, n=3). \*\*p < 0.01, \*\*\*p < 0.001 versus wild type.

(H) Phylogenetic comparison of CHP1 orthologues and paralogues in metazoans. Protein sequences and comparisons were obtained from Ensembl (EMBL-EBI). CHP1 orthologues were highlighted in blue. Lowest peptide similarity in each group were shown.

(I) Fold change (log<sub>2</sub>) in the abundance of triacylglycerols of wild type and *pbo-1\_KD C. elegans*. Values were normalized to the average of the wild type animals (mean ± SD, n=3). \*p < 0.05 versus wild type.

(J) Relative quantification of *elm* mRNA levels in the control and *elm\_KD* flies. *Drosophila UAS-elm* RNAi or *UAS-White* RNAi transgenes were expressed under *Actin5C Gal4* driver. *White* RNAi served as control. Expression levels were normalized to *Rpl32* (mean ± SD, n=6). \*\*p < 0.01 versus wild type.

(K) Fold change (log<sub>2</sub>) in the abundance of triacylglycerols of control and *elm\_KD D. melanogaster* midgut. Values were normalized to the average of the control animals (mean ± SD, n=3). \*\*\*p < 0.001 versus wild type.

(L) Fat bodies from 5-days old adult flies were fixed and stained with Nile red. Representative images of Nile red fluorescence (green) in the indicated animals were shown. Scale bar, 50 μm.

**Figure S3: CHP1 ablation alters metabolite abundance in the glycerolipid synthesis pathway, Related to Figure 3.**

(A) Fold change (log<sub>2</sub>) in indicated lipid groups of Jurkat wild type, CHP1\_KO and rescued CHP1\_KO cells treated with 50μM palmitate for 24 hrs prior to lipid extraction. Lipid species of the same group were summed. Values were normalized to the average of the wild type untreated cells (mean ± SD, n=3). \*\*\*p < 0.001.

(B) Maximal exogenous fatty acid oxidation of wild type and CHP1\_KO HeLa cells measured by Seahorse Fatty Acid Oxidation Assay (mean ± SD, n=3).

(C) Fold change (log<sub>2</sub>) in the abundance of palmitoyl-CoA of wild type, ACSL3\_KO and CHP1\_KO Jurkat cells treated with 50μM palmitate for 24 hrs prior to metabolite extraction. Values were normalized to the average of the untreated wild type cells (mean ± SD, n=3). \*\*p < 0.01, \*\*\*p < 0.001.

(D) Fold change (log<sub>2</sub>) in the abundance of acylcarnitine of wild type and *pbo-1\_KD C. elegans*. Values were normalized to the average of the wild type animals (mean ± SD, n=3). \*p < 0.05 versus wild type.

(E) Fold change ( $\log_2$ ) in the abundance of acylcarnitine of control and *elm\_KD D. melanogaster* midgut. Values were normalized to the average of the control animals (mean  $\pm$  SD, n=3). \*\*p < 0.01 versus control.

**Figure S4: CHP1 interacts with GPAT4 and this interaction is required for GPAT4 function, Related to Figure 4.**

(A) Motif analysis of CHP1 amino acid sequence. Analysis was carried out using MyHits (SIB).

(B) Immunoprecipitation of endogenous GPAT4 protein in HeLa cells. Anti-GPAT4 immunoprecipitates were prepared from cell lysates and analyzed by immunoblotting for levels of indicated proteins.

(C) CHP1 co-essentiality analysis using data from Wang et al. (2017). Gene correlation scores with CHP1 were calculated for all genes and ranked. The top co-essential gene is GPAT4 (red). Other GPATs (blue) do not correlate well with CHP1.

(D) Changes in lipid profiles of Jurkat wild type, CHP1\_KO, GPAT4\_KO and GPAT3\_KO cells treated with control BSA or 50 $\mu$ M palmitate for 24 hrs prior to lipid extraction. Lipid species of the same group were summed. Values were normalized to the average of the untreated wild type controls (n=3).

(E) Fold change in cell number ( $\log_2$ ) of Jurkat wild type (black) and two clones of GPAT4\_KO (blue) cells after a 4-day treatment with the indicated palmitate concentrations (mean  $\pm$  SD, n=3). \*\*\*p < 0.001 versus wild type.

(F) Immunoblot analysis of HeLa wild type and CHP1\_KO cells treated with 100 $\mu$ g/mL cycloheximide for the indicated durations.  $\beta$ -actin was used as a loading control (top). Densitometry analysis of GPAT4 protein levels from the above immunoblot. GPAT4 level was normalized to the initial (t=0) (bottom).

(G) Immunoblot analysis of HeLa wild type, GPAT4\_KO, rescued GPAT4\_KO, CHP1\_KO and rescued CHP1\_KO cells.  $\beta$ -actin was used as a loading control.

(H) Relative mRNA expression levels of *Chp1* and *Gpat4* in the indicated HeLa cell lines. Expression levels were normalized to *Rpl32* (mean  $\pm$  SD, n=3).

(I) Identification of terminal regions of GPAT4 responsible for CHP1 interaction. Plasmids containing cDNA for HA-GPAT4 mutants with N- or C-terminal deletions, as well as full length HA-GPAT4, were expressed in HeLa rescued CHP1\_KO cells. Immunoblot of co-immunoprecipitates with the indicated HA-GPAT4 constructs.

(J) Indicated deletions and full length HA-tagged GPAT4 cDNAs were expressed in HeLa cells.

(K) Interaction of CHP1 with large N-terminal deletions of HA-tagged GPAT4. Indicated deletions and full length HA-tagged GPAT4 cDNA were expressed in HeLa cells. Anti-HA immunoprecipitates were prepared from cell lysates and analyzed by immunoblotting for levels of indicated proteins.

(L) Interaction of CHP1 with full length and small 113-119del HA-tagged GPAT4 accounting for the reduction of CHP1 levels in GPAT4\_KO cells. Indicated deletion and full length HA-tagged GPAT4 cDNA were expressed in HeLa cells. Anti-HA immunoprecipitates were prepared from cell lysates of cells expressing full length and 3X the amount of cells expressing 113-119del HA-GPAT4 and analyzed by immunoblotting for levels of indicated proteins.

**Figure S5: GPAT4 interaction mutant does not affect localization of GPAT4, Related to Figure 4.**

(A) Representative confocal immunofluorescence images of HeLa GPAT4\_KO cells expressing wild type or interaction deficient (113-119del) HA-GPAT4. Stains for HA (green) and ER (red) were used. Insets show 5X magnified images. Scale bar, 10  $\mu$ m.

(B) Representative confocal immunofluorescence images of HeLa CHP1\_KO cells expressing FLAG-CHP1 and HA-GPAT4, treated with 1mM oleate. Stains for HA (green), FLAG (red) and neutral lipids (blue) were used. Insets show 5X magnified images. Scale bar, 10  $\mu$ m.

**Figure S6: CHP1 myristoylation mutant does not affect localization or GPAT4 interaction, Related to Figure 5.**

(A) Radiolabeled GPAT activity assay of the indicated HeLa cell lines. Cell lysates were incubated with [<sup>14</sup>C]-glycerol-3-phosphate. GPAT activity was quantified as the CPM in the non-polar fraction (mean  $\pm$  SD, n=3). \*\*\*p < 0.001 versus wild type.

(B) Representative confocal immunofluorescence images of HeLa CHP1\_KO cells expressing wild type or myristoylation mutant FLAG-CHP1. Stains for FLAG (green) and ER (red) were used. Insets show 5X magnified images. Scale bar, 10  $\mu$ m.

(C) Immunoblot of co-immunoprecipitates with the indicated FLAG-CHP1 constructs.  $\beta$ -actin was used as a loading control.

(D) Immunoblot and in-gel fluorescence analysis of bifunctional fatty acid incorporation. HeLa CHP1\_KO cells expressing the indicated FLAG-CHP1 constructs were incubated with 500  $\mu$ M of the indicated bifunctional fatty acids or control palmitate for 24 hrs prior to immunoprecipitation. Fluorescence indicates incorporation of fatty acids through click chemistry with azido-rhodamine.

(E) Immunoblot using antibody against GPAT4 on immunoprecipitates with FLAG-CHP1 or FLAG-CHP1-myr\_mut in the presence or absence of x-alk-16 photo-crosslinking. Crosslinked complex of CHP1-GPAT4 appeared as a higher band with a combined molecular weight of these two proteins (~80 kDa).

**Figure S7: ABCD3 and GNPAT are required for cell survival upon loss of CHP1, Related to Figure 6.**

(A) Guide scores (log<sub>2</sub> fold change) of individual sgRNAs targeting ABCD3 and GNPAT used in the isogenic screen in wild type (black) or CHP1\_KO (gray) cells.
